# Supplementary figures and images for: Liquid–liquid phase separation mediates the formation of herpesvirus assembly compartments
Source: PubMed Central journal article supplement — J Cell Biol. 2022 Oct 17;222(1):e202201088. doi: 10.1083/jcb.202201088 (PMC9579985; doi:10.1083/jcb.202201088), 2022-10-17

Source figure S1 B

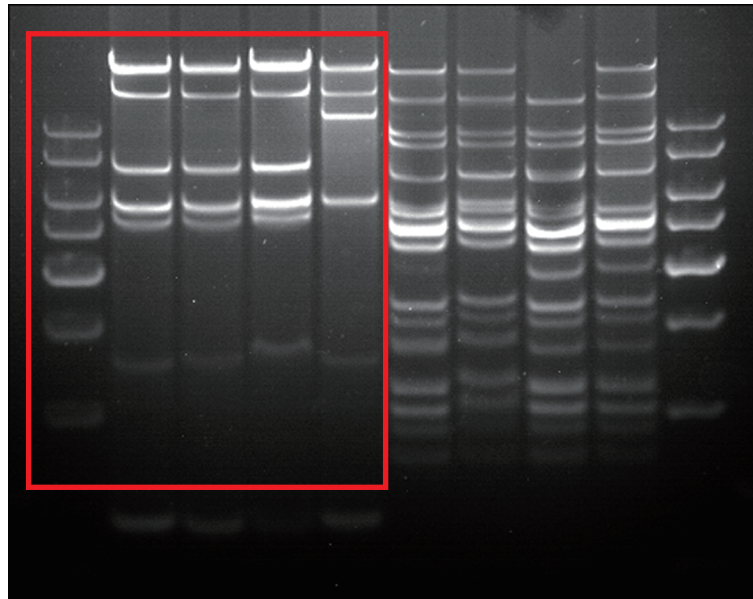

digestion by Pte I

Source figure S1 B

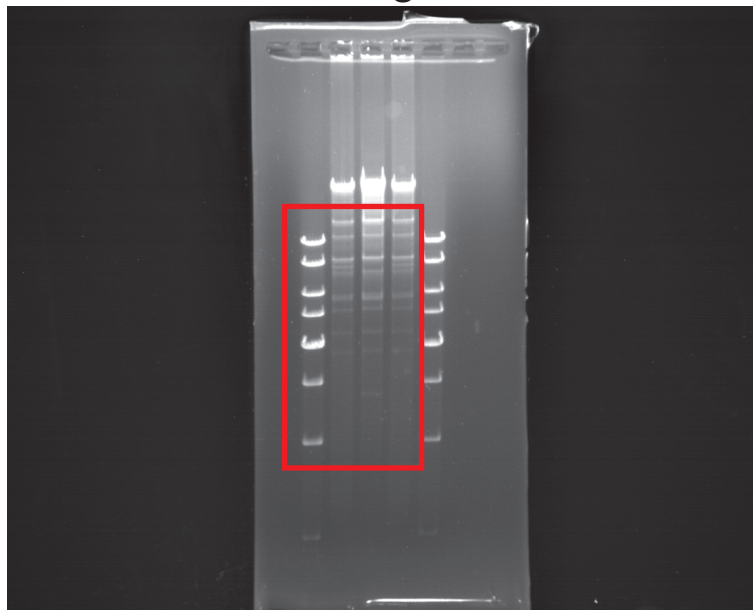

digestion by Kpn I

Supplement: JCB_202201088_SourceDataFS1.pdf [file JCB_202201088_SourceDataFS1.pdf]

Source figure S2 B

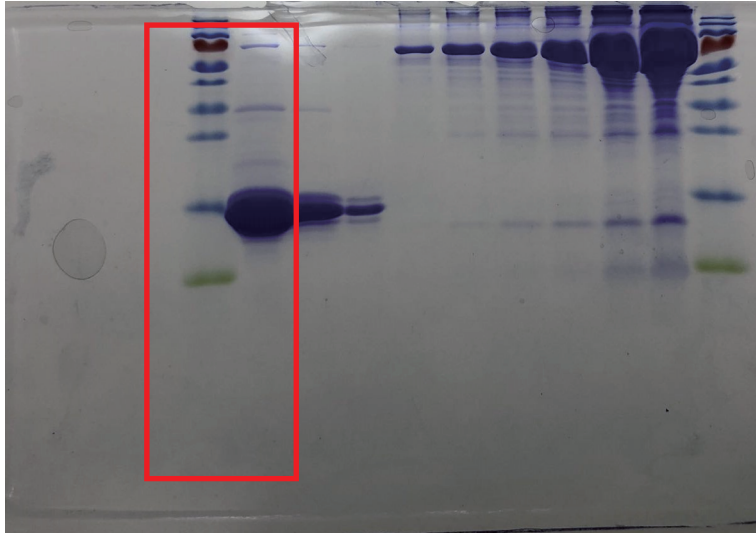

Source figure S2 D

ORF52

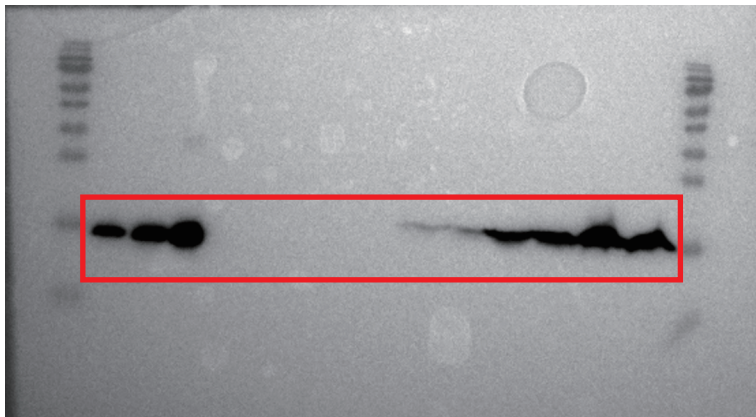

Source figure S2 D

Actin

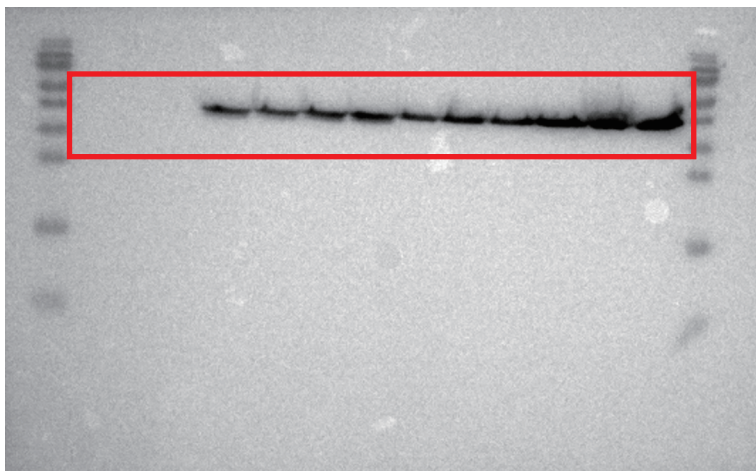

Supplement: JCB_202201088_SourceDataFS2.pdf [file JCB_202201088_SourceDataFS2.pdf]

Source figure S3A

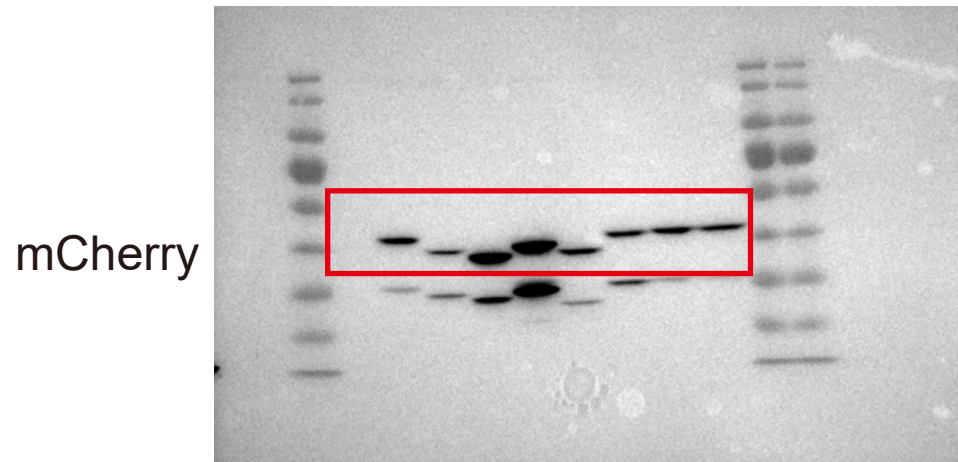

Source figure S3A

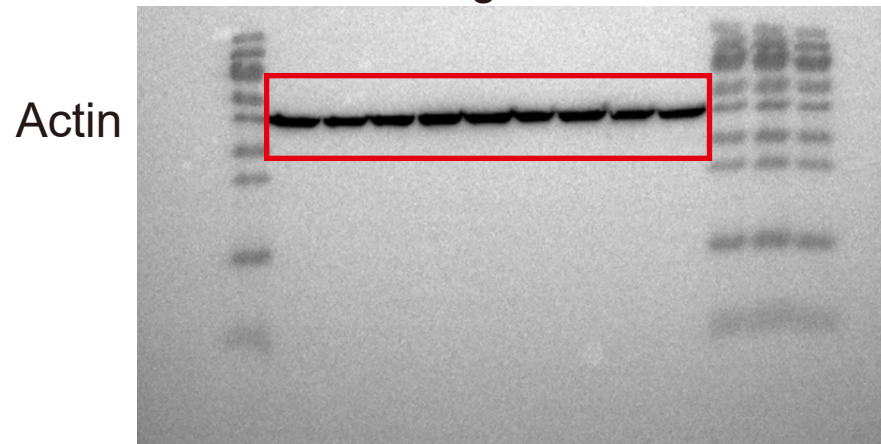

Supplement: JCB_202201088_SourceDataFS3.pdf [file JCB_202201088_SourceDataFS3.pdf]
